# Supplementary material for: Gene Expression Correlation for Cancer Diagnosis: A Pilot Study
Source: Hindawi journal article supplement (doi:10.1155/2014/253804), 2014-01-01
Supplement: f1 [file 253804.f1.pdf]

**Table S1: Patient demographic characteristics and cancer stage for the Origene TissueScan Oncology qPCR Cancer Survey Panel 96.**

| <b>Patient Number</b> | <b>Tissue</b> | <b>Age</b> | <b>Gender</b> | <b>Stage</b> | <b>Patient Number</b> | <b>Tissue</b> | <b>Age</b> | <b>Gender</b> | <b>Stage</b> |
|-----------------------|---------------|------------|---------------|--------------|-----------------------|---------------|------------|---------------|--------------|
| A01                   | Breast        | 44         | F             | 0            | E01                   | Lung          | 49         | F             | 0            |
| A02                   | Breast        | 45         | F             | 0            | E02                   | Lung          | 79         | M             | 0            |
| A03                   | Breast        | 32         | F             | 0            | E03                   | Lung          | 62         | F             | 0            |
| A04                   | Breast        | 47         | F             | I            | E04                   | Lung          | 71         | M             | Ia           |
| A05                   | Breast        | 52         | F             | I            | E05                   | Lung          | 64         | M             | Ib           |
| A06                   | Breast        | 57         | F             | IIa          | E06                   | Lung          | 85         | F             | Ib           |
| A07                   | Breast        | 42         | F             | IIa          | E07                   | Lung          | 72         | M             | Ib           |
| A08                   | Breast        | 63         | F             | IIIa         | E08                   | Lung          | 63         | M             | IIb          |
| A09                   | Breast        | 61         | F             | IIIa         | E09                   | Lung          | 71         | M             | IIb          |
| A10                   | Breast        | 55         | F             | IIIc         | E10                   | Lung          | 58         | M             | IIIa         |
| A11                   | Breast        | 45         | F             | IV           | E11                   | Lung          | 80         | M             | IIIb         |
| A12                   | Breast        | 42         | F             | IV           | E12                   | Lung          | 51         | M             | IV           |
| B01                   | Colon         | 61         | M             | 0            | F01                   | Ovary         | 70         | F             | 0            |
| B02                   | Colon         | 91         | M             | 0            | F02                   | Ovary         | 31         | F             | 0            |
| B03                   | Colon         | 37         | F             | 0            | F03                   | Ovary         | 42         | F             | 0            |
| B04                   | Colon         | 93         | F             | I            | F04                   | Ovary         | 29         | F             | Ia           |
| B05                   | Colon         | 65         | M             | IIa          | F05                   | Ovary         | 43         | F             | Ib           |
| B06                   | Colon         | 78         | M             | IIa          | F06                   | Ovary         | 51         | F             | Ic           |
| B07                   | Colon         | 66         | M             | IIa          | F07                   | Ovary         | 80         | F             | IIb          |
| B08                   | Colon         | 86         | M             | III          | F08                   | Ovary         | 46         | F             | IIIa         |
| B09                   | Colon         | 42         | F             | IIIb         | F09                   | Ovary         | 52         | F             | IIIb         |
| B10                   | Colon         | 61         | M             | IIIc         | F10                   | Ovary         | 74         | F             | IIIc         |
| B11                   | Colon         | 63         | M             | IIIc         | F11                   | Ovary         | 77         | F             | IIIc         |
| B12                   | Colon         | 51         | F             | IV           | F12                   | Ovary         | 79         | F             | IV           |

|     |        |    |   |      |     |          |    |   |     |
|-----|--------|----|---|------|-----|----------|----|---|-----|
| C01 | Kidney | 71 | M | 0    | G01 | Prostate | 68 | M | 0   |
| C02 | Kidney | 66 | M | 0    | G02 | Prostate | 65 | M | 0   |
| C03 | Kidney | 54 | F | 0    | G03 | Prostate | 76 | M | 0   |
| C04 | Kidney | 52 | M | I    | G04 | Prostate | 70 | M | I   |
| C05 | Kidney | 55 | F | I    | G05 | Prostate | 63 | M | II  |
| C06 | Kidney | 52 | M | I    | G06 | Prostate | 70 | M | II  |
| C07 | Kidney | 57 | F | II   | G07 | Prostate | 71 | M | II  |
| C08 | Kidney | 59 | M | III  | G08 | Prostate | 56 | M | II  |
| C09 | Kidney | 37 | M | III  | G09 | Prostate | 63 | M | II  |
| C10 | Kidney | 64 | M | III  | G10 | Prostate | 53 | M | III |
| C11 | Kidney | 70 | M | IV   | G11 | Prostate | 65 | M | III |
| C12 | Kidney | 51 | M | IV   | G12 | Prostate | 61 | M | III |
| D01 | Liver  | 81 | M | 0    | H01 | Thyroid  | 30 | F | 0   |
| D02 | Liver  | 86 | M | 0    | H02 | Thyroid  | 68 | F | 0   |
| D03 | Liver  | 33 | F | 0    | H03 | Thyroid  | 46 | F | 0   |
| D04 | Liver  | 79 | M | I    | H04 | Thyroid  | 15 | F | I   |
| D05 | Liver  | 58 | F | I    | H05 | Thyroid  | 28 | F | I   |
| D06 | Liver  | 66 | M | I    | H06 | Thyroid  | 39 | F | I   |
| D07 | Liver  | 63 | F | II   | H07 | Thyroid  | 57 | M | II  |
| D08 | Liver  | 68 | M | II   | H08 | Thyroid  | 74 | M | II  |
| D09 | Liver  | 62 | F | II   | H09 | Thyroid  | 76 | F | III |
| D10 | Liver  | 71 | M | IIIa | H10 | Thyroid  | 52 | F | III |

|     |           |    |   |    |     |         |    |   |     |
|-----|-----------|----|---|----|-----|---------|----|---|-----|
| D11 | Liver     | 21 | M | IV | H11 | Thyroid | 52 | M | IVa |
| D12 | Bile duct | 66 | M | IV | H12 | Thyroid | 45 | F | IVa |

---
